# Supplementary material
Source: PubMed Central journal article supplement (PMC9550582)

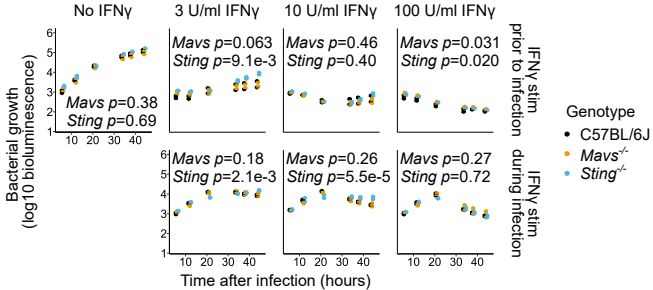

Supplement: NIHMS1755762-supplement-fS1.pdf [file NIHMS1755762-supplement-fS1.pdf]

**A**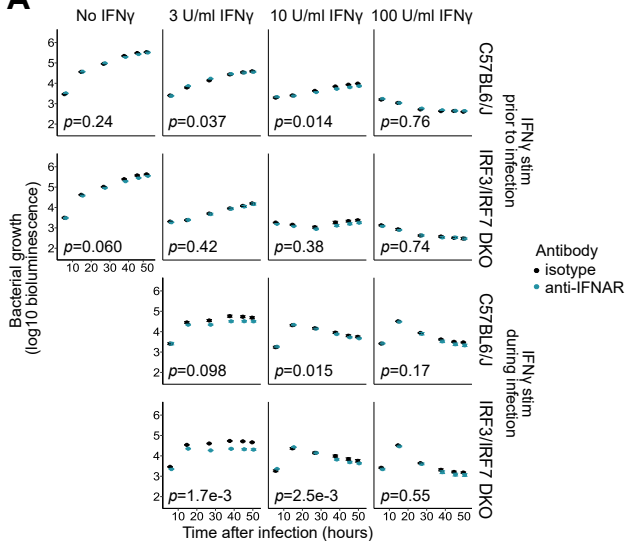**B**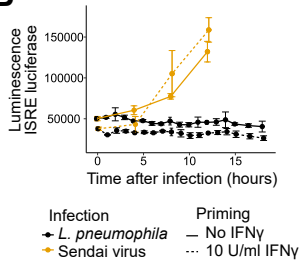

Supplement: NIHMS1755762-supplement-fS2.pdf [file NIHMS1755762-supplement-fS2.pdf]

Bacterial growth  
(log<sub>10</sub> bioluminescence)

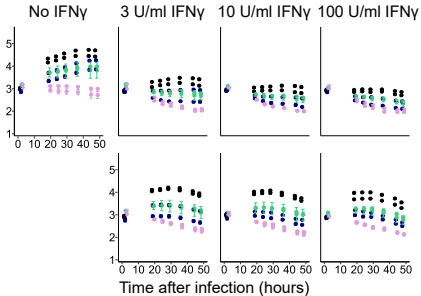

Supplement: NIHMS1755762-supplement-fS3.pdf [file NIHMS1755762-supplement-fS3.pdf]
